# Supplementary material
Source: PubMed Central journal article supplement (PMC4150376)
Supplement: Supp_Data.pdf [file Supp_Data.pdf]

# Supplemental information

## List of the ARNSHL disease causing genes;

*ADCY1* (MIM 103072), *BSND* (MIM 606412), *CABP2* (MIM 607314), *CDH23* (MIM 605516), *CLDN14* (MIM 605608), *CIB2* (MIM 605564), *COL11A2* (MIM 120290), *DFNB31* (MIM 607928), *ELMOD3* (MIM 615427), *ESPN* (MIM 606351), *ESRRB* (MIM 602167), *GIPC3* (MIM 608792), *GJB2* (MIM 121011), *GJB3* (MIM 603324), *GJB6* (MIM 604418), *GRXCR1* (MIM 613283), *GRXCR2* (MIM Not available), *HGF* (MIM 142409), *ILDR1* (MIM 609739), *LHFPL5* (MIM 6094270), *LOXHD1* (MIM 613072), *LRTOMT* (MIM 612414), *MARVELD2* (MIM 610572), *MSRB3* (MIM 613719), *MYO15A* (MIM 602666), *MYO3A* (MIM 606808), *MYO6* (MIM 600970), *MYO7A* (MIM 276903), *NESP4* (MIM 615535), *OTOA* (MIM 607038), *OTOF* (MIM 603681), *OTOG* (MIM 604487), *OTOGL* (MIM 614925), *PCDH15* (MIM 605514), *PJKV* (MIM 610219), *PTPRQ* (MIM 603317), *RDX* (MIM 179410), *SERPINB6* (MIM 173321), *SLC26A4* (MIM 605646), *SLITRK6* (MIM 609681), *STRC* (MIM 606440), *TECTA* (MIM 602574), *TMC1* (MIM 606706), *TMIE* (MIM 607237), *TMPRSS3* (MIM 605511), *TPRN* (MIM 613354), *TRIOBP* (MIM 609761), *TSPEAR* (MIM 612920) and *USH1* (MIM 605242).\*

\*Van Camp G, Smith RJH. Hereditary Hearing Loss Homepage. URL: <http://hereditaryhearingloss.org>
