# Supplementary material
Source: PubMed Central journal article supplement (PMC4150376)
Supplement: Supp_Figure1.pdf [file Supp_Figure1.pdf]

(a)

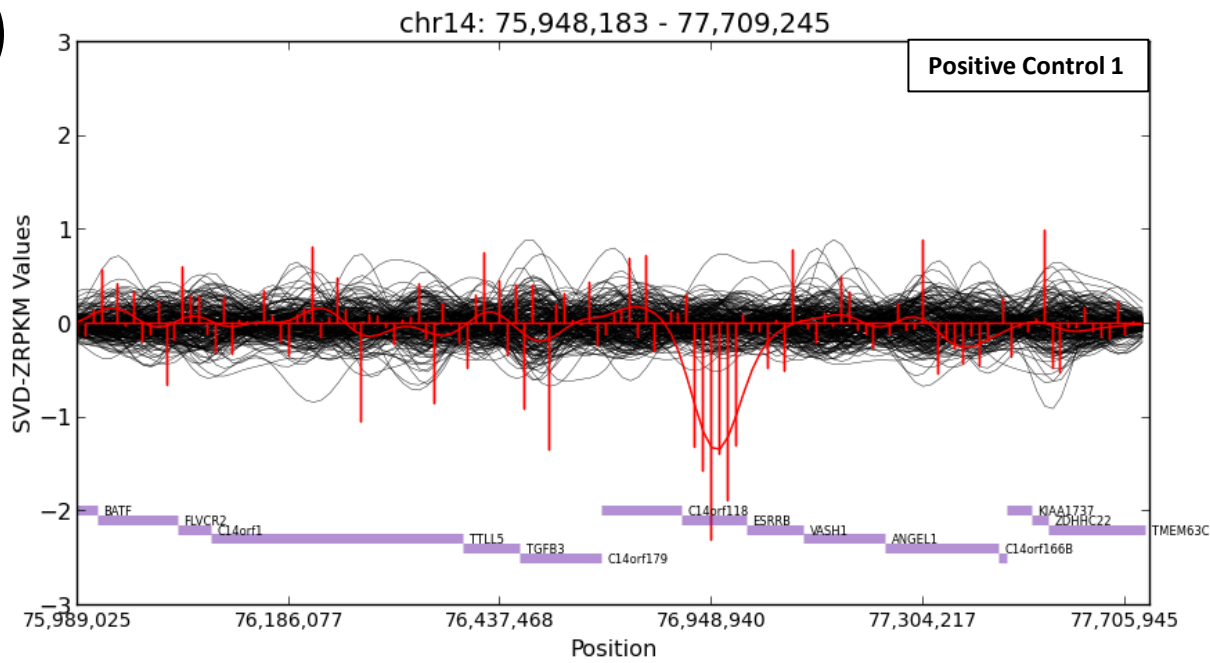

(b)

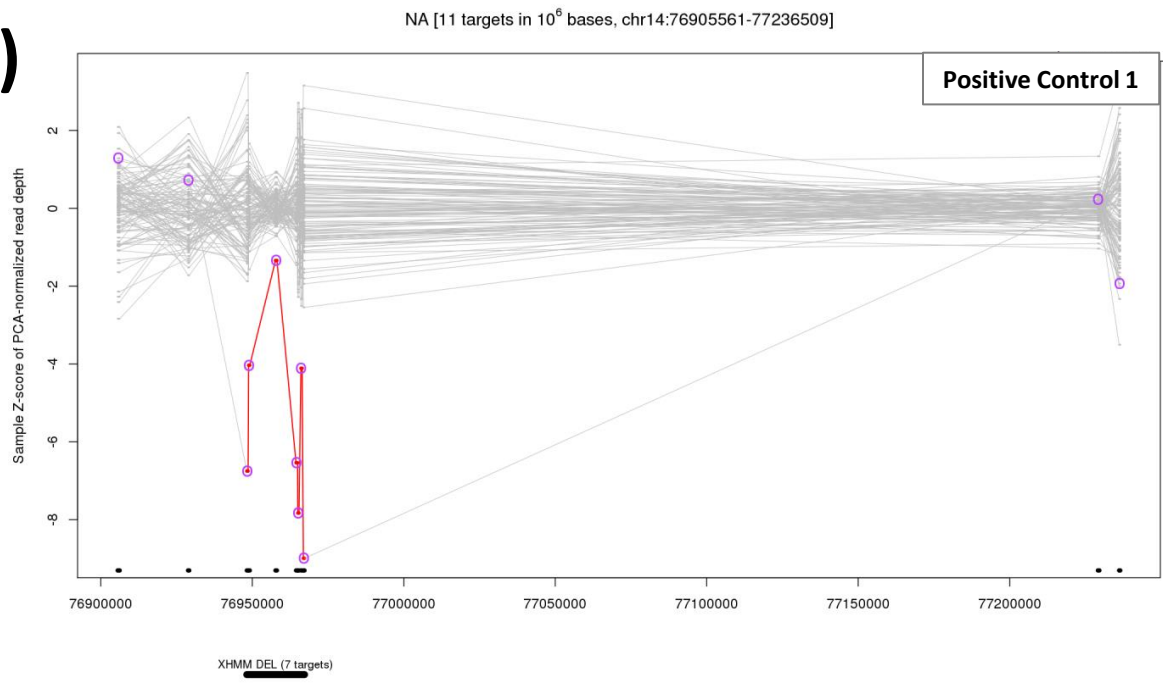

Supp. Figure 1: *ESRRB* deletion in positive control 1. Visualized results of the CoNIFER (a) and XHMM (b) shows heterozygous deletion of the *ESRRB* in positive control 1.
